# Supplementary material for: Association of Bariatric Surgery With Risk of Fracture in Patients With Severe Obesity
Source: PubMed Central journal article supplement (PMC7287567; doi:10.1001/jamanetworkopen.2020.7419), 2020-06-10
Supplement: jamanetwopen-3-e207419-s001.pdf [file jamanetwopen-3-e207419-s001.pdf]

## Supplementary Online Content

Khalid SI, Omotosho PA, Spagnoli A, Torquati A. Association of bariatric surgery with risk of fracture in patients with severe obesity. *JAMA Netw Open*. 2020;3(6):e207419. doi:10.1001/jamanetworkopen.2020.7419

**eTable 1.** Coding Definitions

**eTable 2.** Coding Definitions For Fracture Categories

**eTable 3.** Descriptive Characteristics of Bariatric Surgery–Eligible Patients and Patients Who Underwent Roux-en-Y Gastric Bypass or Sleeve Gastrectomy

This supplementary material has been provided by the authors to give readers additional information about their work.

**eTable 1. Coding Definitions**

| <b>Category</b>                 | <b>ICD-9 Codes, (CPT Codes)</b>                                                                                                                   |
|---------------------------------|---------------------------------------------------------------------------------------------------------------------------------------------------|
| <b>Osteoporosis</b>             | <i>73300, 73301, 73302, 73303, 73309</i>                                                                                                          |
| <b>Hypertension</b>             | <i>4010, 4011, 4019</i>                                                                                                                           |
| <b>Smoking Status</b>           | <i>3051, V1582</i>                                                                                                                                |
| <b>Obstructive Sleep Apnea</b>  | <i>32723</i>                                                                                                                                      |
| <b>Hyperlipidemia</b>           | <i>272.0, 272.1, 272.2, 272.3</i>                                                                                                                 |
| <b>Osteoarthritis</b>           | <i>71500, 71510, 71509, 71516, 71530, 71531, 71590, 71504</i>                                                                                     |
| <b>Type 2 Diabetes</b>          | <i>25000, 25002, 25010, 25012, 25020, 25022, 25030, 25032, 25040, 25050, 25042, 25052, 25060, 25062, 25070, 25072, 25080, 25082, 25090, 25092</i> |
| <b>NAFLD</b>                    | <i>5715</i>                                                                                                                                       |
| <b>BMI &gt;35</b>               | <i>V8535, V8536, V8537, V8538, V8539, V8541, V8542, V8543, V8544, V8545, 27801</i>                                                                |
| <b>Postmenopausal Status</b>    | <i>6279, 6278, 25631, 6272, 6273, V074, V4981</i>                                                                                                 |
| <b>Sleeve Gastrectomy</b>       | <i>4382, (43775)</i>                                                                                                                              |
| <b>Roux-en-Y Gastric Bypass</b> | <i>4438, 4439, (43644, 43645, 43846, 43847)</i>                                                                                                   |

**eTable 2.** Coding Definitions For Fracture Categories

| <b>Fracture</b> | <b>ICD-9 Code</b>                                                                                                                                                                                                                                                                                                                                                                                                                                             |
|-----------------|---------------------------------------------------------------------------------------------------------------------------------------------------------------------------------------------------------------------------------------------------------------------------------------------------------------------------------------------------------------------------------------------------------------------------------------------------------------|
| Humerus         | <i>812.00, ICD-9-D-81201, ICD-9-D-81202, ICD-9-D-81203, ICD-9-D-81209, ICD-9-D-8121, ICD-9-D-81210, ICD-9-D-81211, ICD-9-D-81212, ICD-9-D-81213, ICD-9-D-81219, ICD-9-D-8122, ICD-9-D-81220, ICD-9-D-81221, ICD-9-D-81230, ICD-9-D-81231, ICD-9-D-8124, ICD-9-D-81240, ICD-9-D-81241, ICD-9-D-81242, ICD-9-D-81243, ICD-9-D-81244, ICD-9-D-81249, ICD-9-D-81250, ICD-9-D-81251, ICD-9-D-81252, ICD-9-D-81253, ICD-9-D-81254, ICD-9-D-81259, ICD-9-D-73311</i> |
| Radius or Ulnar | <i>ICD-9-D-73312, ICD-9-D-81300, ICD-9-D-81301, ICD-9-D-81302, ICD-9-D-81303, ICD-9-D-81304, ICD-9-D-81305, ICD-9-D-81306, ICD-9-D-81307, ICD-9-D-81308</i>                                                                                                                                                                                                                                                                                                   |
| Pelvic          | <i>ICD-9-D-73398, ICD-9-D-8080, ICD-9-D-8081, ICD-9-D-8082, ICD-9-D-8083, ICD-9-D-80841, ICD-9-D-80842, ICD-9-D-80843, ICD-9-D-80844, ICD-9-D-80849, ICD-9-D-80851, ICD-9-D-80852, ICD-9-D-80853, ICD-9-D-80854, ICD-9-D-80859, ICD-9-D-8088, ICD-9-D-8089</i>                                                                                                                                                                                                |
| Hip             | <i>ICD-9-D-73314, ICD-9-D-73396, ICD-9-D-82000, ICD-9-D-82001, ICD-9-D-82002, ICD-9-D-82003, ICD-9-D-82009, ICD-9-D-82010, ICD-9-D-82011, ICD-9-D-82012, ICD-9-D-82013, ICD-9-D-82019, ICD-9-D-82020, ICD-9-D-82021, ICD-9-D-82022, ICD-9-D-82030, ICD-9-D-82031, ICD-9-D-82032, ICD-9-D-8208, ICD-9-D-8209</i>                                                                                                                                               |
| Vertebral       | <i>ICD-9-D-8052, ICD-9-D-8054, ICD-9-D-8058, ICD-9-D-73313</i>                                                                                                                                                                                                                                                                                                                                                                                                |

**eTable 3.** Descriptive Characteristics of Bariatric Surgery–Eligible Patients and Patients Who Underwent Roux-en-Y Gastric Bypass or Sleeve Gastrectomy

| Parameters                                      | Total<br>(N=2,276,861) | Bariatric<br>Surgery-<br>Eligible<br>Patients<br>(N=2,188,008) | Roux-en-Y<br>Gastric<br>Bypass<br>(N=71,783) | Sleeve<br>Gastrectomy<br>(N=17,070) | p-Value            |
|-------------------------------------------------|------------------------|----------------------------------------------------------------|----------------------------------------------|-------------------------------------|--------------------|
| <b>Age</b>                                      |                        |                                                                |                                              |                                     | <.001 <sup>a</sup> |
| 64 and under, n (%)                             | 965,845 (42.4)         | 899,878 (41.1)                                                 | 54,308 (75.7)                                | 11,659 (68.3)                       |                    |
| 65-69, n (%)                                    | 613,060 (26.9)         | 594,866 (27.2)                                                 | 13,812 (19.2)                                | 4,382 (25.7)                        |                    |
| 70-74, n (%)                                    | 337,852 (14.8)         | 333,916 (15.3)                                                 | 3,027 (4.2)                                  | 909 (5.3)                           |                    |
| 75-79, n (%)                                    | 199,847 (8.8)          | 199,190 (9.1)                                                  | 542 (0.8)                                    | 115 (0.7)                           |                    |
| 80-84, n (%)                                    | 104,213 (4.6)          | 104,136 (4.8)                                                  | 77 (0.1)                                     | -                                   |                    |
| 85 and over, n (%)                              | 56,039 (2.5)           | 56,022 (2.6)                                                   | 17 (0.02)                                    | -                                   |                    |
| <b>Sex</b>                                      |                        |                                                                |                                              |                                     | <.001 <sup>a</sup> |
| Male, n (%)                                     | 799,056 (35.1)         | 777,521 (35.5)                                                 | 17,161 (23.9)                                | 4,374 (25.6)                        |                    |
| Female, n (%)                                   | 1,477,805<br>(64.9)    | 1,410,487<br>(64.5)                                            | 54,622 (76.1)                                | 12,696 (74.4)                       |                    |
| <b>Comorbidities</b>                            |                        |                                                                |                                              |                                     |                    |
| DM (II), n (%)                                  | 982,336 (43.1)         | 938,136 (42.9)                                                 | 36,107 (50.3)                                | 8,093 (47.4)                        | <.001 <sup>a</sup> |
| NAFLD, n (%)                                    | 27,731 (1.2)           | 26,539 (1.2)                                                   | 957 (1.3)                                    | 235 (1.4)                           | .003 <sup>a</sup>  |
| Osteoarthritis, n (%)                           | 472,497 (20.8)         | 448,567 (20.5)                                                 | 19,370 (27.0)                                | 4,560 (26.7)                        | <.001 <sup>a</sup> |
| Hypertension, n (%)                             | 1,482,607<br>(65.1)    | 1,421,105<br>(64.9)                                            | 49,293 (68.7)                                | 12,209 (71.5)                       | <.001 <sup>a</sup> |
| Smoking Status, n (%)                           | 552,334 (24.3)         | 528,219 (24.1)                                                 | 18,702 (26.1)                                | 5,413 (31.7)                        | <.001 <sup>a</sup> |
| Hyperlipidemia, n (%)                           | 1,133,070<br>(49.8)    | 1,084,805<br>(49.6)                                            | 38,549 (53.7)                                | 9,716 (56.9)                        | <.001 <sup>a</sup> |
| Osteoporosis, n (%)                             | 138,157 (6.1)          | 133,623 (6.1)                                                  | 3,739 (5.2)                                  | 795 (4.7)                           | <.001 <sup>a</sup> |
| OSA, n (%)                                      | 440,826 (19.4)         | 406,588 (18.6)                                                 | 26,429 (36.8)                                | 7,809 (45.7)                        | <.001 <sup>a</sup> |
| <sup>a</sup> Significant Values ( $p < 0.008$ ) |                        |                                                                |                                              |                                     |                    |
